# Supplementary material for: Modifications in Tissue and Cell Ultrastructure as Elements of Immunity-Like Reaction in Chenopodium quinoa against Prune Dwarf Virus (PDV)
Source: MDPI journal article supplement (doi:10.3390/cells9010148), 2020-01-08
Supplement: s1 [file s1]

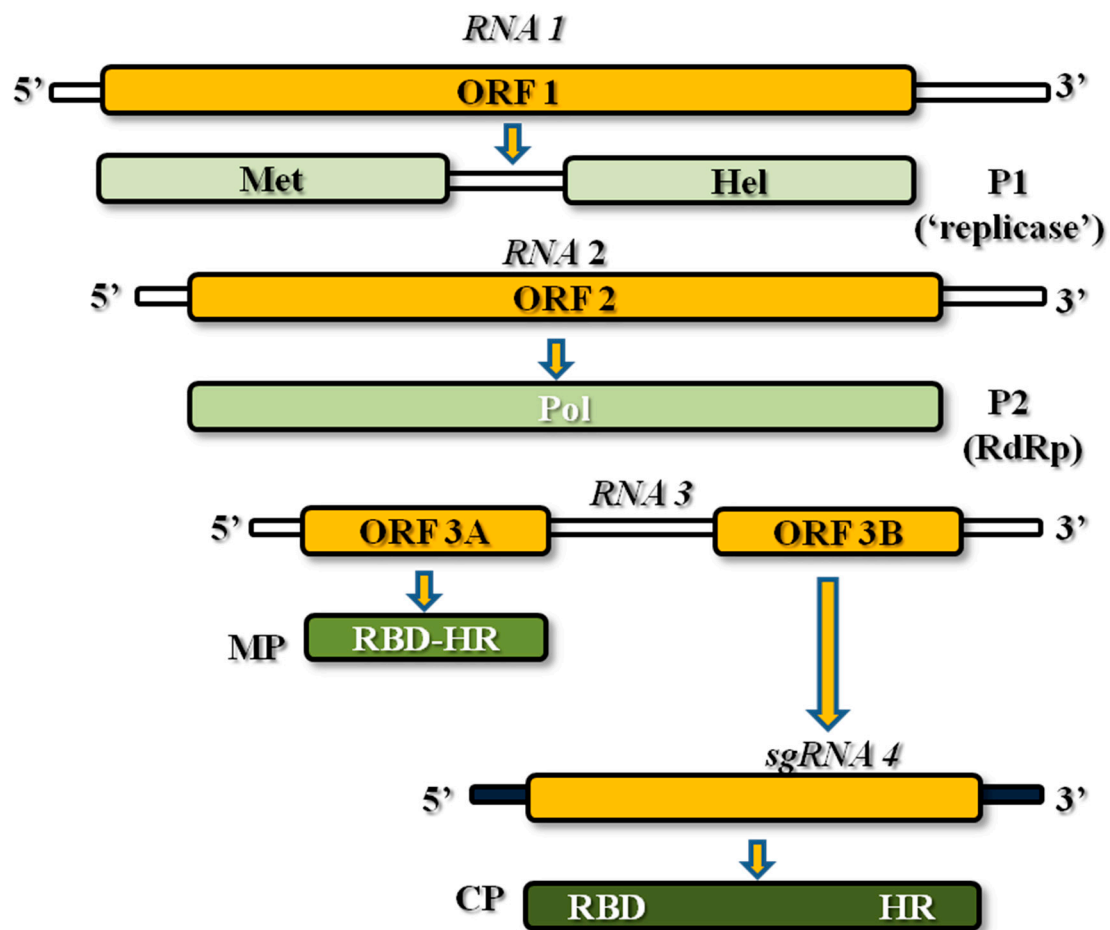

**Scheme S1.** Genome of *Prune dwarf virus* (PDV). Scheme presenting the ORFs and proteins encoded by PDV. Encoded proteins: P1 with methyltransferase and helicase domains, P2—polymerase, MP—movement protein, CP—coat protein. ORF—open reading frame, RBD—RNA binding domain, HR—hydrophobic region.

**Table S1.** Accessions of genes, sequences of primers, temperature of annealing, concentration in reaction, and product lengths for real-time qPCR. bp, base pair.

| Genes               | Gene ID      | Forward primer       | Reverse primer       | Temperature of primer annealing (°C) | Concentration in reaction (μM) | Product length (bp) |
|---------------------|--------------|----------------------|----------------------|--------------------------------------|--------------------------------|---------------------|
| <i>Investigated</i> |              |                      |                      |                                      |                                |                     |
| <i>MP</i>           | HM015770.1   | GCTGACGATGGAGATGGAAT | CCAATTACCAAACGCGACTT | 58                                   | 0,5                            | 20                  |
| <i>Reference</i>    |              |                      |                      |                                      |                                |                     |
| <i>Actin</i>        | LOC110724665 | AGGAGGGTCTATCCTTGCGT | TGAACAATTGATGGGCCGGA | 58                                   | 0,5                            | 180                 |

**Table S2.** Conditions of qPCR reaction of investigated *MP* gene and also for reference. Fluorescence signal reading set on the end of stage marked by asterisk (\*).

| <i>Program</i>            | <i>Parameters</i>                                   |
|---------------------------|-----------------------------------------------------|
| Preliminary denaturation  | 95 °C for 5 min                                     |
| Amplification (35 cycles) | 95 °C for 10 s<br>58 °C for 10 s<br>72 °C for 20 s* |
| Melting curve             | 65–95 °C; 0.1 °C/s                                  |

**Table S3.** Characteristic of qPCR reaction for individual pairs of primers.

| <i>Gene</i>  | <i>Reaction efficiency [%]</i> | <i>R<sup>2</sup> factor</i> |
|--------------|--------------------------------|-----------------------------|
| <i>Actin</i> | 92,5                           | 0,999                       |
| <i>MP</i>    | 99,4                           | 0,998                       |

**Table S4.** PDV detection assessment using double antibody sandwich enzyme-linked immunosorbent assay (DAS-ELISA) on quinoa leaves. Mean optical density (OD<sub>405nm</sub>) values are presented with standard deviations ( $\pm$ s). Presence of PDV (+) is confirmed in samples with mean OD<sub>405nm</sub> above 0.200.

| Sample                                                       | Mean OD <sub>450nm</sub> $\pm$ s    | Result of test: presence (+) or absence (–) of PDV |
|--------------------------------------------------------------|-------------------------------------|----------------------------------------------------|
| Buffer                                                       | 0.0001 $\pm$ 0.002                  | –                                                  |
| Mock-inoculated quinoa leaves (7 dpi)                        | 0.0101 $\pm$ 0.02                   | –                                                  |
| Stem between mock-inoculated point and leaves above (7 dpi)  | 0.0110 $\pm$ 0.01                   | –                                                  |
| Leaves above mock-inoculation point (7 dpi)                  | 0.0101 $\pm$ 0.02                   | –                                                  |
| PDV-inoculated quinoa leaves (7 dpi)                         | <b>0.5600 <math>\pm</math> 0.03</b> | <b>+</b>                                           |
| Stem between PDV-inoculation point and leaves above (7 dpi)  | 0.0190 $\pm$ 0.001                  | –                                                  |
| Leaves above PDV inoculation (7 dpi)                         | 0.0110 $\pm$ 0.01                   | –                                                  |
| Mock-inoculated quinoa leaves (14 dpi)                       | 0.0120 $\pm$ 0.02                   | –                                                  |
| Stem between mock-inoculated point and leaves above (14 dpi) | 0.0123 $\pm$ 0.01                   | –                                                  |
| Leaves above mock-inoculation point (14 dpi)                 | 0.0120 $\pm$ 0.02                   | –                                                  |
| PDV-inoculated quinoa leaves (14 dpi)                        | <b>0.250 <math>\pm</math> 0.01</b>  | <b>+</b>                                           |
| Stem between PDV inoculation point and leaves above (14 dpi) | 0.017 $\pm$ 0.02                    | –                                                  |
| Leaves above PDV inoculation (14 dpi)                        | 0.012 $\pm$ 0.01                    | –                                                  |
| Leaves from mock-inoculated quinoa (20 dpi)                  | 0.011 $\pm$ 0.02                    | –                                                  |
| Stem between mock-inoculated point and leaves above (20 dpi) | 0.013 $\pm$ 0.01                    | –                                                  |
| Stem between PDV inoculation point and leaves above (20 dpi) | 0.017 $\pm$ 0.02                    | –                                                  |
| Leaves above PDV inoculation (20 dpi)                        | 0.011 $\pm$ 0.02                    | –                                                  |

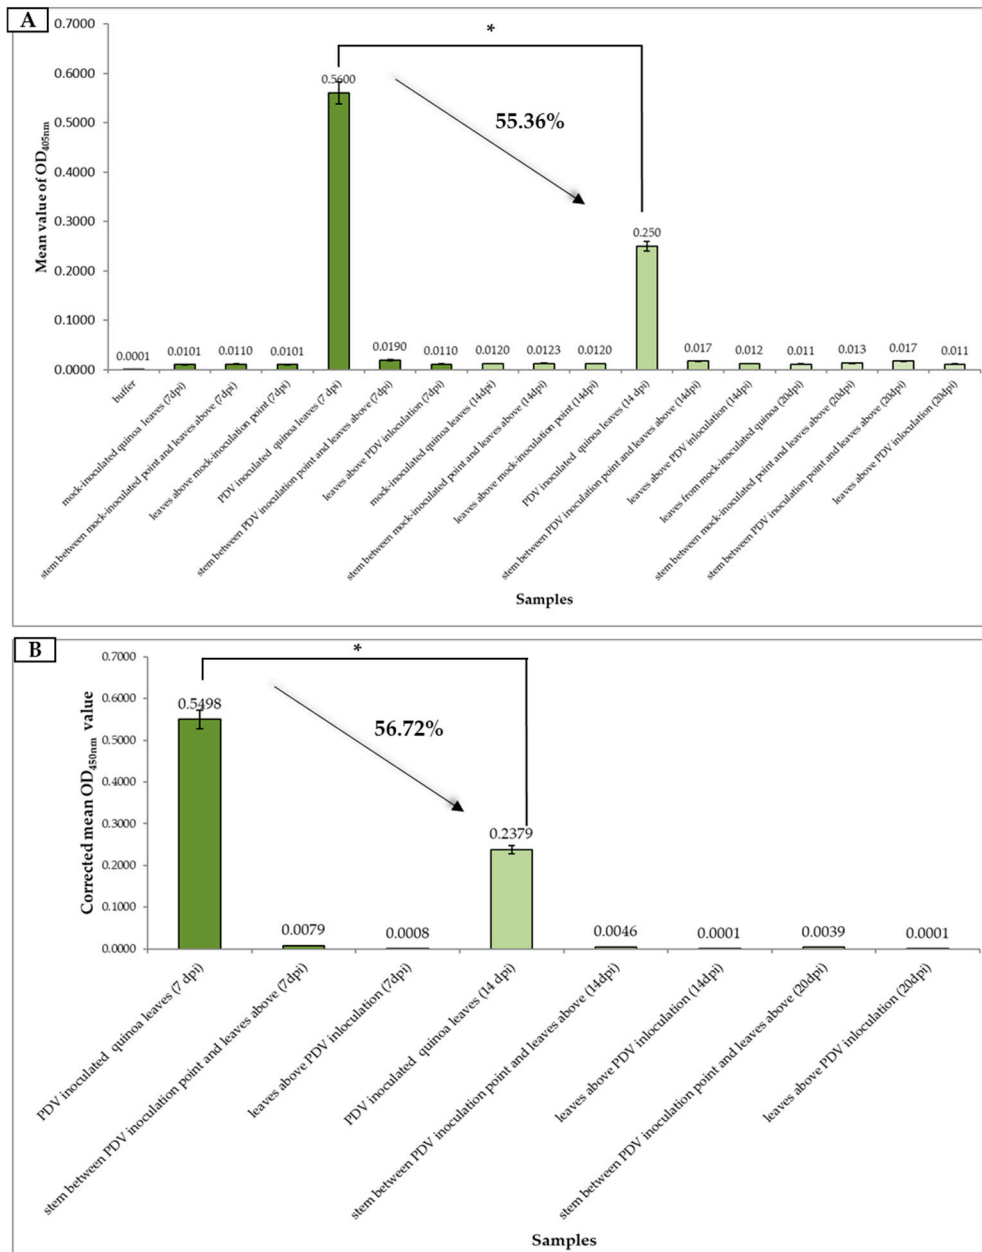

**Figure S1.** PDV detection and relative virus concentration assessment by using DAS-ELISA in quinoa leaves. The mean of OD<sub>405nm</sub> and corrected OD<sub>405nm</sub> values were assessed with ANOVA statistics method. (A) The assessment of the mean OD<sub>405nm</sub>. Black arrows show the per cent decrease in PDV relative concentration during infection process. (B) The assessment of the corrected mean OD<sub>405nm</sub> (mean OD<sub>405nm</sub> of sample from PDV inoculated plant- sum of means OD<sub>405nm</sub> of buffer and appropriate mock inoculated plant). Black arrows show the per cent decrease in PDV relative concentration during infection process in the inoculated leaves. Mean values of OD<sub>405nm</sub> corrected OD<sub>405nm</sub> were estimated at the  $p < 0.05$  level of significance using post-hoc Tukey HSD test. The statistical significant values on (A) and (B) are marked by (\*).

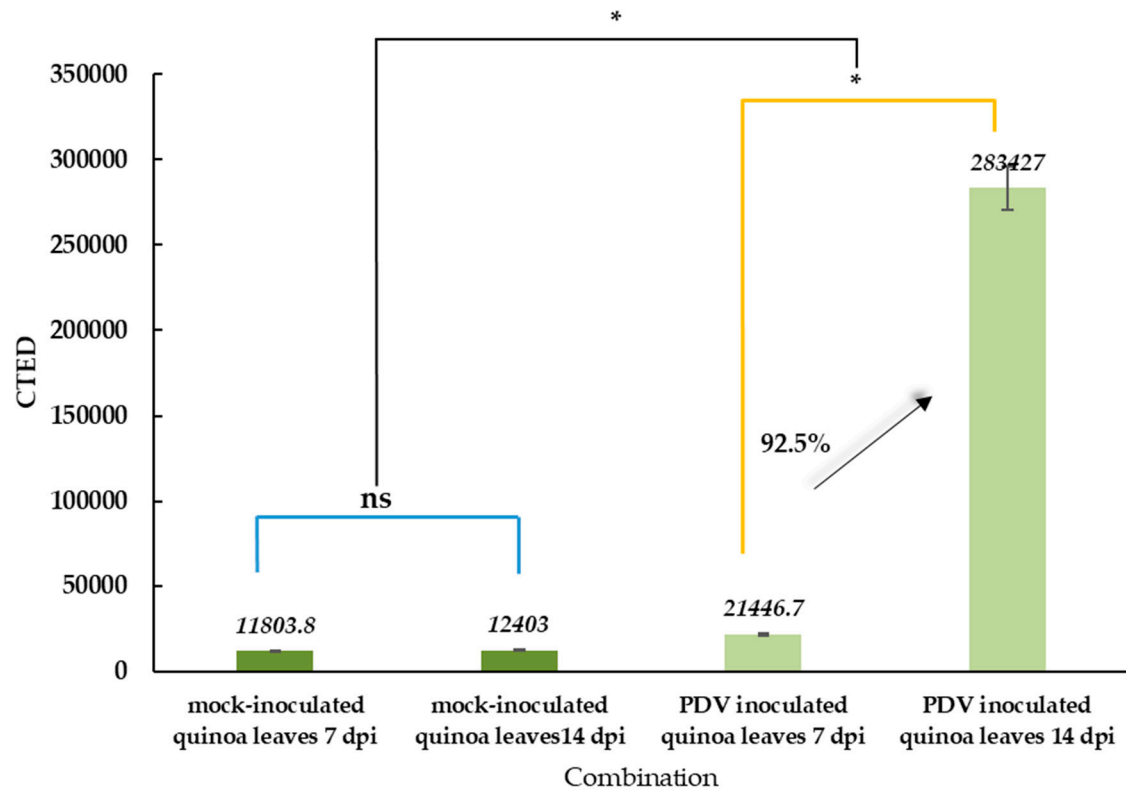

**Figure S2.** Corrected total electron density (CTED) of cerium (IV) perhydroxide precipitate in mock- and PDV-inoculated quinoa leaves (7 and 14 dpi) combined with ANOVA. Black arrow depicts percentage increase in hydrogen peroxide amount over the time of infection in PDV-inoculated leaves. Mean CTED values were evaluated at the  $p < 0.05$  level of significance using Tukey's post hoc HSD test. Nonsignificant (ns) values within blue bracket. Significant statistical values between PDV-inoculated quinoa leaves at 7 and 14 dpi within orange bracket (\*). Significant values between PDV- and mock-inoculated quinoa leaves at 7 and 14 dpi marked by black bracket with asterisk (\*).
